# Supplementary material
Source: Springer Nature journal article supplement (https://springermedizin.de/resource/supplementary/13063_2011_922_MOESM2_ESM.pdf/9618656)
Supplement: MOESM2 [file 9618656]

## **Baseline Research**

Provider Survey  
GPS & GIS Mapping

HH Survey

Qualitative: Healthcare  
Qualitative: Social Capital

## **I. Design**

Design workshop (x1)  
Benefit Options workshop (x1)  
Awareness Tools workshop (x1)

## **2. Awareness**

Awareness Campaign (x3)  
CHAT (x2)  
Enrollment (x1)

## **3. Launching**

Selection of Officers  
Training of Officers  
Installation of MIS

## **4. Live Scheme**

Claim Submission  
Claim Decision  
Claim Payment

## **Key Outcome Indicators**

Intensity of Usage of Health Services  
Levels of Healthcare Expenditure

Equity of Usage of Health Services  
Socio-Economic Status of Household  
Accessibility of Healthcare
